# Supplementary material
Source: PubMed Central journal article supplement (PMC6867838)
Supplement: IAI.00455-19-s0001.pdf [file IAI.00455-19-s0001.pdf]

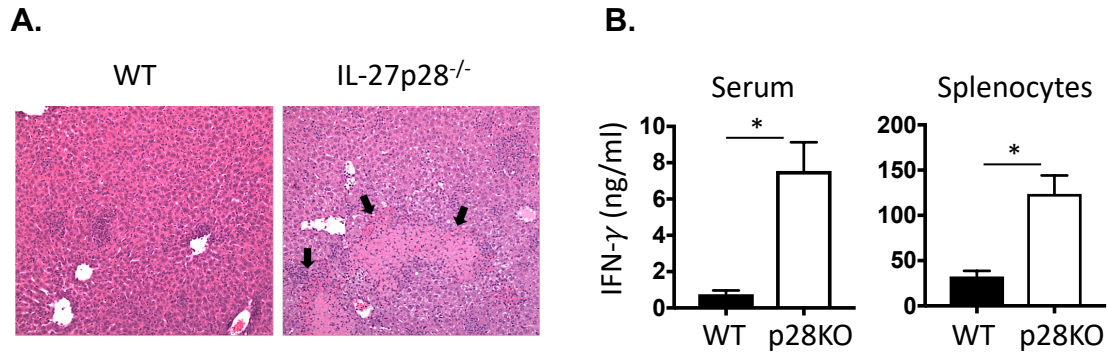

**S.Fig. 1. Liver pathology and IFN- $\gamma$  expression in IL-27p28<sup>-/-</sup> mice.** A. H&E stained section for liver histology. B. IFN-g expression measured by ELISA in circulation or by splenocytes stimulated with STAg. Representative and combined data collected (n=6-8, mean  $\pm$  SEM) from 2-3 independent experiments. \*Significant differences between indicated groups (P<0.05).

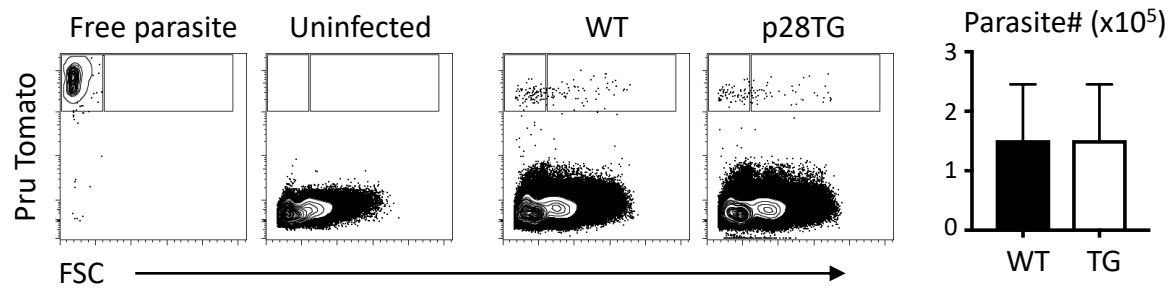

**S.Fig. 2. Parasite burden in blood during acute infection.** WT and IL-27p28TG mice were infected i.p. with  $1 \times 10^5$  tachyzoites of the Prugniaud strain of *T. gondii* that expresses tdTomato for 5 days. Parasite burden in the circulation was quantified by flow cytometry. Representative flow plots and combined data collected (mean  $\pm$  SEM, n=6) from 2 independent experiments are shown.

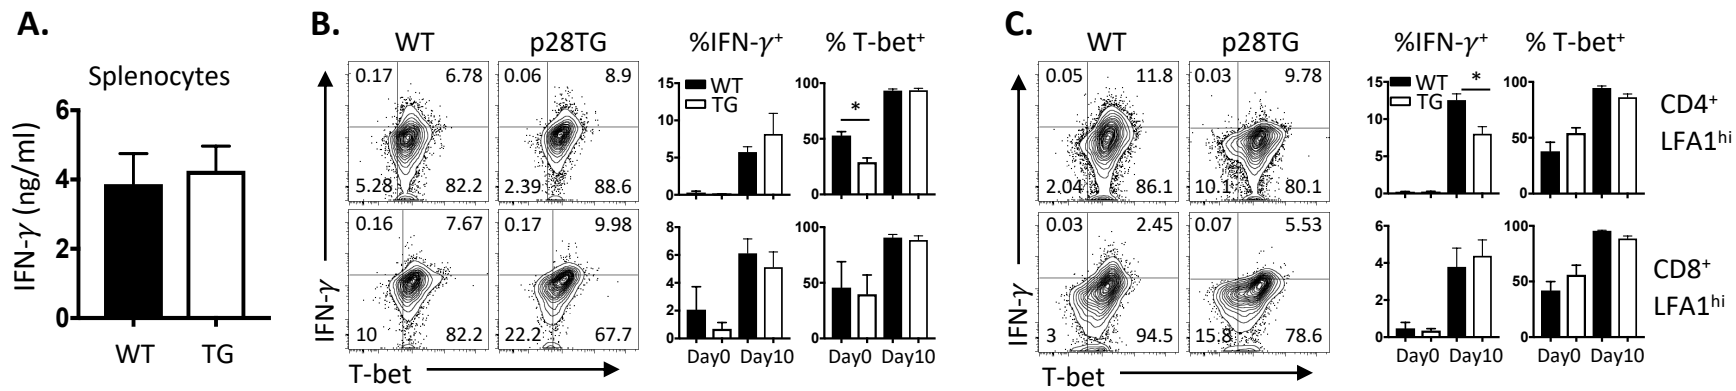

**S.Fig. 3. Effector T cell activity in acute infection.** A. Levels of IFN- $\gamma$  produced by splenocytes without restimulation of infected WT and IL-27p28 transgenic mice at day 10 post infection. Levels of intracellular IFN- $\gamma$  and T-bet was examined in T cells from the peritoneum (B) and spleen (C). Representative flow plots and collated data (mean  $\pm$  SEM, n=3-6) from 2 independent experiments.

|               |            | <b>IgG (ug/ml)</b> | <b>IgA (ug/ml)</b> | <b>IgM (ug/ml)</b> |
|---------------|------------|--------------------|--------------------|--------------------|
| <b>Day0</b>   | WT         | 1288±631           | 98±9               | 203±104            |
|               | IL-27p28TG | 696±602            | 47±19              | 142±91             |
| <b>Day10</b>  | WT         | 5249±2534          | 317±119            | 671±130            |
|               | IL-27p28TG | 819±699            | 106±53             | 177±61             |
| <b>Day 30</b> | WT         | 6264±2072          | 139±46             | 488±180            |
|               | IL-27p28TG | 271±236            | 42±28              | 45±34              |

**S.Table 1. Levels of total immunoglobulins in circulation.** Concentrations of non-specific IgG, IgA and IgM in serum from 2 independent experiments were examined by ELISA (mean ± SEM, n=3~4).
